# Supplementary material
Source: publisher figshare collection journal article supplement (https://acs.figshare.com/ndownloader/files/3811654)
Supplement: Supplementary file 1 [file 3811654]

# **Mechanical performance of spider silk is robust to nutrient-mediated changes in protein composition**

Sean J Blamires<sup>†,\*</sup>, Chen-Pan Liao<sup>†</sup>, Chung-Kai Chang<sup>§</sup>, Yu-Chun Chuang<sup>§</sup>, Chung-Lin Wu<sup>‡</sup>,  
Todd A. Blackledge<sup>⊥</sup>, Hwo-Shuenn Sheu<sup>§</sup> and I-Min Tso<sup>†</sup>

<sup>†</sup>Department of Life Science, Tunghai University, Taichung 40704, Taiwan.

<sup>‡</sup>Evolution & Ecology Research Centre, School of Biological, Earth & Environmental Sciences,  
The University of New South Wales, Sydney 2052, Australia

<sup>§</sup>National Synchrotron Radiation Research Center, Hsinchu 3000, Taiwan

<sup>‡</sup>Center for Measurement Standards, Industrial Technology Research Institute, Hsinchu 30011,  
Taiwan

<sup>⊥</sup>Department of Biology, Integrated Bioscience Program, The University of Akron, Akron, OH  
44325, USA.

## Supporting information

**Table S1. Comparison across experimental treatments of the mechanical parameters: ultimate strength, extensibility, toughness, Young's modulus and % shrink at supercontraction, of *Nephila pilipes* major ampullate silks.** Shows means  $\pm$  s.e. for silks from spiders after pre-treatment feeding, and upon feeding on either the protein rich (P) or protein deprived (NP) solutions and outcomes of Fisher's Least Significant Difference (LSD) post-hoc analyses.

| Property                             | Pre-treatment    | Treatment<br>NP   | P                 | Fisher's LSD |
|--------------------------------------|------------------|-------------------|-------------------|--------------|
| Ultimate strength (MPa)              | 519.1 $\pm$ 87.0 | 534.7 $\pm$ 122.4 | 366.5 $\pm$ 194.5 | P>NP         |
| Extensibility (mm mm <sup>-1</sup> ) | 0.3 $\pm$ 0.2    | 0.5 $\pm$ 0.2     | 0.3 $\pm$ 0.0     | P> NP        |
| Toughness (MJ m <sup>-3</sup> )      | 177.0 $\pm$ 25.5 | 235.1 $\pm$ 14.1  | 211.1 $\pm$ 20.4  | P=NP         |
| Young's modulus (GPa)                | 6.2 $\pm$ 0.6    | 7.7 $\pm$ 0.9     | 6.0 $\pm$ 2.0     | P>NP         |
| % shrink                             | 0.4 $\pm$ 0.0    | 0.4 $\pm$ 0.1     | 0.3 $\pm$ 0.1     | P>NP         |

**Table S2. Comparison across experimental treatments of the mechanical parameters: ultimate strength, extensibility, toughness and Young's modulus, in *Nephila pilipes* major ampullate silks when supercontracted.** Shows means  $\pm$  s.e. for silks from spiders after pre-treatment feeding, and upon feeding on either the protein rich (P) or protein deprived (NP) solutions and outcomes of Fisher's Least Significant Difference (LSD) post-hoc analyses.

| Property                             | Treatment         |                   | Fisher's LSD |
|--------------------------------------|-------------------|-------------------|--------------|
|                                      | P                 | NP                |              |
| Ultimate strength (MPa)              | 297.7 $\pm$ 130.3 | 315.7 $\pm$ 153.5 | P=NP         |
| Extensibility (mm mm <sup>-1</sup> ) | 0.9 $\pm$ 0.3     | 0.9 $\pm$ 0.4     | P=NP         |
| Toughness (MJ m <sup>-3</sup> )      | 213.7 $\pm$ 13.0  | 229.8 $\pm$ 22.2  | P=NP         |
| Young's modulus (GPa)                | 7.3 $\pm$ 1.2     | 8.1 $\pm$ 2.1     | P=NP         |
